# Supplementary material
Source: publisher figshare collection journal article supplement (https://gsapubs.figshare.com/articles/dataset/_/25439152)
Supplement: Supplementary file 1 [file 1]

## Sheet: Table 2 All Synchrotron Lines
	1	2	3	4	5	6	7	8	9	10	11	12	13	14	15	16	17	18	19	20	21	22	23	24	25	26	27	28	29	30	31	32	33	34	35	36	37	38	39	40	41	42	43	44	45	46	47	48	49
	MF-1					Thickness (mm)	H2O3500 (wt.%)	H2Omol5200(wt.%)	H2Omol1630(wt.%)	OHby difference(wt.%)	Calc ε3500	CO2 (ppm)		MF-2					Thickness (mm)	H2O3500 (wt.%)	H2Omol5200(wt.%)	H2Omol1630(wt.%)	OHby difference(wt.%)	Calc ε3500	CO2 (ppm)		MF-4					Thickness (mm)	H2O3500 (wt.%)	H2Omol(wt.%)	H2Omol1630(wt.%)	OHby difference(wt.%)	Calc ε3500	CO2 (ppm)		MF-5b					Thickness (mm)	H2O3500 (wt.%)	H2Omol(wt.%)	H2Omol1630(wt.%)	OHby difference(wt.%)
				2σ μncertainty		0.005	0.1 to 0.2	0.1 to 0.2	-	-	-	11 to 28					2σ μncertainty		0.004	0.1	0.1	-	-		12 to 18					2σ μncertainty		0.002	0.1	0.1	-	-	-	8 to 11					2σ μncertainty		0.001	0.1	0.1	-	-
				Representative interior (Positions 250 to 300 μm)		-	0.734931	0.152885	0.368872	0.366059	77.9158	465.608					Representative interior (Positions 150 to 200 μm)		-	0.734209	0.327103	0.355584	0.378625	78.6823	309.012					Representative interior (Positions 250 to 300 μm)		-	0.828219	0.218012	0.438127	0.390092	75.0323	446.266					Representative interior (Positions 125 to 175 μm)		-	0.91902	-	0.511829	0.407191
				Representative exterior (Positions 0 to 10 μm)			2.25585	1.86111	1.83371	0.422141	64.2339	143.293					Representative exterior (Positions 0 to 10 μm)			2.51362	2.26277	2.0299	0.483712	64.4587	119.275					Representative exterior (Positions 0 to 10 μm)			2.70684	1.69638	2.28379	0.423046	62.8783	188.572					Representative exterior (Positions 0 to 10 μm)			2.2349		1.84344	0.391465
	Position (μm)	Abs3500	Abs2350	Abs5230	Abs1630	Thickness (mm)	H2O3500 (wt.%)	H2Omol5200(wt.%)	H2Omol1630(wt.%)	OHby difference(wt.%)	Calc ε3500	CO2 (ppm)		Position (μm)	Abs3500	Abs2350	Abs5230	Abs1630	Thickness (mm)	H2O3500 (wt.%)	H2Omol5200(wt.%)	H2Omol1630(wt.%)	OHby difference(wt.%)	Calc ε3500	CO2 (ppm)		Position (μm)	Abs3500	Abs2350	Abs5230	Abs1630	Thickness (mm)	H2O3500 (wt.%)	H2Omol5200(wt.%)	H2Omol1630(wt.%)	OHby difference(wt.%)	Calc ε3500	CO2 (ppm)		Position (μm)	Abs3500	Abs2350	Abs5230	Abs1630	Thickness (mm)	H2O3500 (wt.%)	H2Omol5200(wt.%)	H2Omol1630(wt.%)	OHby difference(wt.%)
	0	1.29491	0.0524018	0.0296948	0.902879	0.0686	2.30386	1.86	1.87486	0.428992	64.1931	120.427		0	0.900378	0.0324433	0.0208382	0.575896	0.0422	2.52699	2.12761	1.944	0.582989	66.151	121.204		0	0.996932	0.0495209	0.0173998	0.742308	0.0458	2.72127	1.6286	2.30878	0.412485	62.6694	170.462		0	0.896559	0.0691738	-	0.635091	0.0488	2.25512	-	1.85388	0.401244
	2	1.26513	0.057537	0.0316141	0.895566	0.06864	2.26184	1.98152	1.85859	0.403248	63.8444	132.152		2	0.909196	0.0253904	0.0181834	0.598478	0.0424988	2.55878	1.83805	2.00602	0.552758	65.5051	94.1883		2	1.00216	0.0527321	0.0199337	0.74531	0.0458598	2.73075	1.86787	2.3151	0.415651	62.6973	181.279		2	0.897051	0.0722076	-	0.641935	0.04894	2.25822	-	1.86849	0.389729
	4	1.25612	0.0611853	0.0302146	0.873959	0.06868	2.23053	1.89095	1.8127	0.41783	64.2422	140.45		4	0.896609	0.0292113	0.0214529	0.628564	0.0427952	2.56208	2.16063	2.09228	0.469803	64.0682	107.612		4	1.00382	0.0539574	0.0170704	0.742836	0.0459194	2.72667	1.59304	2.30442	0.422248	62.8138	185.25		4	0.89878	0.0739732	-	0.643415	0.04908	2.25643	-	1.86746	0.388973
	6	1.28736	0.0646313	0.0297891	0.881474	0.06872	2.2717	1.8627	1.82722	0.444483	64.6091	148.273		6	0.885112	0.0320395	0.025862	0.63244	0.0430892	2.52933	2.59855	2.09081	0.438516	63.6284	117.225		6	1.00246	0.0557691	0.0178793	0.738566	0.0459786	2.71501	1.66764	2.28822	0.426788	62.9166	191.224		6	0.895973	0.0771425	-	0.631407	0.04922	2.23025	-	1.82739	0.402859
	8	1.26008	0.0680066	0.0282614	0.870486	0.06876	2.22928	1.76438	1.80339	0.425886	64.4058	155.926		8	0.876337	0.0372956	0.0251109	0.625031	0.0433808	2.48578	2.50369	2.05243	0.433348	63.6706	135.539		8	0.996216	0.0578107	0.0198802	0.732738	0.0460374	2.69298	1.85544	2.26726	0.425722	62.9558	197.971		8	0.891274	0.0775269	-	0.631847	0.04936	2.21703	-	1.82348	0.393547
	10	1.25986	0.0709288	0.0289496	0.881677	0.0688	2.23793	1.80708	1.82551	0.412411	64.1084	162.532		10	0.859175	0.0387475	0.023745	0.611251	0.04367	2.41875	2.34807	1.99389	0.424859	63.7287	139.883		10	0.987256	0.060011	0.0168465	0.718043	0.046096	2.65435	1.56568	2.21897	0.435384	63.2172	205.244		10	0.879207	0.082365	-	0.632403	0.0495	2.19236	-	1.81992	0.372439
	12	1.24623	0.0752848	0.0277108	0.863182	0.06884	2.20427	1.72734	1.78618	0.418091	64.3456	172.413		12	0.851735	0.0431775	0.0194486	0.601669	0.0439568	2.37604	1.90198	1.94983	0.426215	63.8927	154.858		12	0.980353	0.0629566	0.0166831	0.716513	0.0461542	2.63721	1.54827	2.21145	0.425761	63.1035	215.047		12	0.870696	0.0850238	-	0.618382	0.04964	2.15504	-	1.77455	0.380486
	14	1.23287	0.0790837	0.0286488	0.864757	0.06888	2.18923	1.78584	1.7884	0.40083	64.056	181.008		14	0.84595	0.0470054	0.0209711	0.606198	0.0442412	2.35694	2.04057	1.95187	0.405064	63.5618	167.504		14	0.972606	0.0645916	0.0177937	0.704806	0.0462122	2.60489	1.65098	2.17259	0.4323	63.3021	220.355		14	0.861743	0.0894627	-	0.608941	0.04978	2.123	-	1.74255	0.380455
	16	1.23936	0.0810047	0.0286359	0.848894	0.06892	2.18091	1.78396	1.75458	0.426333	64.6013	185.297		16	0.838383	0.0494178	0.0226458	0.584094	0.0445232	2.29758	2.19298	1.86879	0.428786	64.2115	174.985		16	0.964522	0.068572	0.0162386	0.700035	0.0462698	2.58149	1.50255	2.15519	0.4263	63.266	233.643		16	0.845317	0.0937252	-	0.59527	0.04992	2.0741	-	1.69865	0.375454
	18	1.22524	0.0842545	0.0290469	0.839397	0.06896	2.15497	1.80898	1.73394	0.421028	64.5965	192.619		18	0.822782	0.0522943	0.0240543	0.579271	0.0448028	2.24921	2.31779	1.84179	0.407416	63.97	184.015		18	0.958612	0.0701797	0.014344	0.694872	0.046327	2.56132	1.3232	2.13666	0.424667	63.2952	238.826		18	0.841004	0.0972892	-	0.589517	0.05006	2.05435	-	1.67753	0.376822
	20	1.20733	0.0879752	0.0277546	0.837552	0.069	2.13171	1.72604	1.72913	0.402579	64.3095	201.009		20	0.809278	0.0555822	0.0229187	0.570216	0.04508	2.19932	2.19197	1.80185	0.397465	63.9518	194.382		20	0.947175	0.0731063	0.0158696	0.69173	0.046384	2.53461	1.46422	2.12438	0.410232	63.1215	248.479		20	0.829601	0.0997236	-	0.582585	0.0502	2.02217	-	1.65318	0.368989
	22	1.19772	0.0902729	0.0276284	0.814264	0.06904	2.09843	1.71704	1.68007	0.418355	64.7721	206.139		22	0.796295	0.0607949	0.0222873	0.561315	0.0453548	2.15127	2.11705	1.76298	0.388286	63.9416	211.323		22	0.938764	0.0741287	0.0161241	0.684684	0.0464406	2.50782	1.48622	2.10018	0.407646	63.1522	251.647		22	0.815093	0.102381	-	0.568662	0.05034	1.97663	-	1.60918	0.367448
	24	1.17039	0.0943202	0.0248269	0.802319	0.06908	2.05538	1.53925	1.65447	0.400904	64.5823	215.256		24	0.782825	0.0622653	0.0212631	0.553781	0.0456272	2.10494	2.00541	1.72893	0.376009	63.8598	215.142		24	0.931737	0.0771537	0.0146978	0.667099	0.046497	2.46924	1.35126	2.04376	0.425481	63.5817	261.599		24	0.797856	0.104495	-	0.557359	0.05048	1.93036	-	1.57282	0.357537
	26	1.15263	0.0977825	0.0261138	0.785925	0.06912	2.01919	1.61943	1.61973	0.399466	64.7047	223.029		26	0.775927	0.0658084	0.0189455	0.546382	0.0458972	2.07068	1.7721	1.6958	0.374882	63.9659	226.047		26	0.923388	0.0797968	0.0165664	0.6684	0.046553	2.45397	1.52389	2.04528	0.408687	63.3278	270.235		26	0.788942	0.105106	-	0.538188	0.05062	1.88749	-	1.51452	0.372963
	28	1.13956	0.101179	0.0246559	0.774529	0.06916	1.99289	1.52669	1.59532	0.397576	64.7779	230.642		28	0.762142	0.0690398	0.0176694	0.538495	0.0461648	2.02458	1.64097	1.66163	0.362943	63.8878	235.772		28	0.90311	0.0813238	0.0153911	0.654098	0.0466086	2.39772	1.41248	1.99913	0.398592	63.3145	275.077		28	0.774818	0.107751	-	0.521095	0.05076	1.83937	-	1.46238	0.376996
	30	1.1324	0.103088	0.0255768	0.7516	0.0692	1.96286	1.58372	1.54719	0.41567	65.3177	234.857		30	0.753767	0.0701736	0.016244	0.530255	0.04643	1.98776	1.4978	1.62686	0.360894	63.9886	238.275		30	0.90019	0.0824641	0.017319	0.646233	0.046664	2.37941	1.5904	1.97275	0.406661	63.52	278.604		30	0.764912	0.111959	-	0.50881	0.0509	1.80394	-	1.42398	0.379965
	32	1.11519	0.106552	0.0243393	0.737448	0.06924	1.92944	1.50501	1.51718	0.412254	65.4013	242.609		32	0.74023	0.074528	0.0161278	0.518471	0.0466928	1.93803	1.47842	1.58175	0.356281	64.0888	251.636		32	0.883532	0.0845908	0.0166896	0.633033	0.046719	2.33096	1.52986	1.93017	0.400785	63.5654	285.452		32	0.753304	0.11509	-	0.493407	0.05104	1.76226	-	1.37708	0.385178
	34	1.09667	0.109492	0.0241218	0.716998	0.06928	1.88889	1.49048	1.47426	0.414626	65.6584	249.161		34	0.729419	0.0755037	0.0134973	0.509139	0.0469532	1.89679	1.22729	1.54467	0.352121	64.1682	253.517		34	0.872463	0.0866162	0.0160208	0.625811	0.0467738	2.30001	1.46588	1.90592	0.394092	63.5391	291.945		34	0.738316	0.117515	-	0.477396	0.05118	1.71488	-	1.32875	0.386136
	36	1.0742	0.113333	0.0237435	0.693319	0.06932	1.84099	1.4659	1.42475	0.41624	65.9482	257.751		36	0.713437	0.0778317	0.0118394	0.487964	0.0472112	1.83179	1.06894	1.47234	0.359454	64.6342	259.905		36	0.857148	0.0874001	0.016102	0.619662	0.0468282	2.26349	1.47168	1.885	0.378485	63.3574	294.245		36	0.722505	0.121854	-	0.458179	0.05132	1.6626	-	1.27178	0.390817
	38	1.04269	0.116892	0.0201579	0.667563	0.06936	1.78106	1.24097	1.37103	0.410025	66.1294	265.694		38	0.70051	0.081107	0.0107819	0.47413	0.0474668	1.78232	0.967233	1.42289	0.359431	64.8732	269.384		38	0.845153	0.0885706	0.0149256	0.609809	0.0468822	2.22766	1.36106	1.85289	0.37477	63.4023	297.841		38	0.697608	0.12464	-	0.437397	0.05146	1.59486	-	1.21079	0.384064
	40	1.0249	0.11931	0.0203879	0.64777	0.0694	1.74208	1.25459	1.32961	0.412462	66.4177	271.032		40	0.682804	0.0816891	0.0106483	0.461255	0.04772	1.72688	0.950011	1.37691	0.349974	64.9171	269.878		40	0.837141	0.0912763	0.0154058	0.596614	0.046936	2.19411	1.40385	1.81072	0.383392	63.6884	306.588		40	0.681721	0.126615	-	0.420399	0.0516	1.54576	-	1.16058	0.385178
	42	0.996107	0.121905	0.018798	0.617896	0.06944	1.68162	1.15491	1.26756	0.414053	66.8338	276.767		42	0.665731	0.0829131	0.010578	0.446581	0.0479708	1.6708	0.9387	1.32613	0.344663	65.0766	272.489		42	0.816448	0.0925528	0.0121367	0.585006	0.0469894	2.14163	1.10132	1.77347	0.36816	63.5639	310.522		42	0.663409	0.129115	-	0.406459	0.05174	1.49696	-	1.11906	0.377899
	44	0.960361	0.124347	0.0205441	0.59986	0.06948	1.62407	1.26285	1.22986	0.394214	66.6802	282.149		44	0.650717	0.0844343	0.00847917	0.432861	0.0482192	1.61996	0.747126	1.27877	0.341189	65.2671	276.059		44	0.807878	0.0942016	0.0105703	0.572888	0.0470426	2.10879	0.956698	1.73477	0.37402	63.8039	315.697		44	0.647815	0.131448	-	0.385065	0.05188	1.44352	-	1.0573	0.386224
	46	0.933132	0.127008	0.017761	0.563301	0.06952	1.55949	1.08923	1.15424	0.405251	67.4339	288.023		46	0.633346	0.0859703	0.00738048	0.411851	0.0484652	1.55649	0.64636	1.21053	0.345958	65.7798	279.654		46	0.801272	0.0948086	0.0123909	0.564677	0.0470954	2.08451	1.12209	1.70799	0.37652	63.9476	317.375		46	0.629744	0.132442	-	0.368409	0.05202	1.39236	-	1.00885	0.383511
	48	0.884336	0.129985	0.0148578	0.525164	0.06956	1.46927	0.909003	1.07547	0.393793	67.7929	294.602		48	0.612586	0.0875479	0.00749014	0.392109	0.0487088	1.4899	0.652724	1.14674	0.343168	66.1345	283.362		48	0.782514	0.0963782	0.0111495	0.548422	0.0471478	2.02941	1.00738	1.65698	0.372433	64.0748	322.27		48	0.614767	0.13533	-	0.348974	0.05216	1.34277	-	0.953059	0.389709
	50	0.855683	0.133836	0.0143633	0.499381	0.0696	1.41295	0.877967	1.02208	0.390864	68.1717	303.156		50	0.591157	0.0886931	0.00580701	0.371466	0.04895	1.42183	0.502797	1.08101	0.340821	66.547	285.654		50	0.768122	0.0977577	0.0103647	0.534814	0.0472	1.98521	0.934754	1.61408	0.371129	64.2257	326.522		50	0.602879	0.136358	-	0.334197	0.0523	1.30366	-	0.91026	0.393396
	52	0.8253	0.136836	0.0121256	0.470254	0.06964	1.35174	0.739728	0.961918	0.389822	68.6889	309.775		52	0.566941	0.0889822	0.00678151	0.352336	0.0491888	1.35198	0.584805	1.02036	0.331619	66.7925	285.194		52	0.757037	0.0988841	0.0103525	0.527341	0.0472518	1.95474	0.93261	1.58978	0.36496	64.215	329.922		52	0.5956	0.138948	-	0.320578	0.05244	1.27302	-	0.870835	0.402187
	54	0.777366	0.139863	0.010122	0.434513	0.06968	1.26492	0.616375	0.888298	0.376619	69.1007	316.444		54	0.5453	0.089906	0.00626766	0.330749	0.0494252	1.28384	0.537653	0.953266	0.330569	67.3294	286.777		54	0.747476	0.10087	0.0110449	0.513857	0.0473034	1.91891	0.994525	1.54744	0.371464	64.5176	336.181		54	0.584866	0.140168	-	0.311127	0.05258	1.24237	-	0.84291	0.399462
	56	0.740984	0.143379	0.00863406	0.397941	0.06972	1.19043	0.524985	0.813065	0.377364	69.9479	324.214		56	0.527143	0.0914586	0.00616461	0.311824	0.0496592	1.22525	0.526261	0.894487	0.330767	67.8781	290.354		56	0.728321	0.101971	0.00927625	0.49692	0.0473546	1.86272	0.833004	1.49482	0.367902	64.6903	339.484		56	0.580585	0.143567	-	0.300627	0.05272	1.22023	-	0.812301	0.407925
	58	0.700157	0.145765	0.00763027	0.365335	0.06976	1.1146	0.463398	0.746018	0.36858	70.5501	329.42		58	0.500664	0.0906572	0.00387384	0.283724	0.0498908	1.14268	0.328514	0.810102	0.332579	68.8063	286.474		58	0.709614	0.104073	0.010128	0.481261	0.0474054	1.8091	0.909215	1.44616	0.36294	64.8272	346.11		58	0.571499	0.146391	-	0.288555	0.05286	1.18921	-	0.777618	0.411596
	60	0.674208	0.148532	0.00809625	0.341242	0.0698	1.0632	0.491555	0.696419	0.366777	71.1789	335.481		60	0.481757	0.0903285	0.00533244	0.265461	0.05012	1.08506	0.450693	0.75449	0.330571	69.4049	284.13		60	0.698537	0.104054	0.00820581	0.468051	0.047456	1.77144	0.734575	1.40497	0.366473	65.1027	345.677		60	0.563582	0.149366	-	0.279013	0.053	1.16308	-	0.749916	0.413168
	62	0.653761	0.151872	0.00605793	0.323858	0.06984	1.02405	0.367131	0.660564	0.363485	71.6177	342.829		62	0.468349	0.0903333	0.00423299	0.247366	0.0503468	1.03678	0.355818	0.699895	0.336887	70.2971	282.865		62	0.682936	0.10554	0.0082475	0.450589	0.0475062	1.7208	0.737548	1.35112	0.369677	65.4525	350.244		62	0.559767	0.15282	-	0.27199	0.05314	1.14611	-	0.729115	0.416997
	64	0.641392	0.153706	0.00299021	0.31613	0.06988	1.00266	0.180775	0.644432	0.358232	71.7203	346.771		64	0.453677	0.0899967	0.00491127	0.232393	0.0505712	0.990892	0.411229	0.654612	0.33628	70.9323	280.561		64	0.66816	0.106794	0.00709168	0.435534	0.0475562	1.67481	0.632853	1.30461	0.3702	65.7258	354.033		64	0.550774	0.154418	-	0.265223	0.05328	1.12192	-	0.709105	0.412811
	66	0.633274	0.154058	0.00483961	0.301334	0.06992	0.97973	0.292742	0.61392	0.36581	72.4287	347.366		66	0.442182	0.0899149	0.00579486	0.213824	0.0507932	0.945917	0.483443	0.599674	0.346243	72.1057	279.081		66	0.652762	0.10716	0.00549858	0.419554	0.0476058	1.62668	0.489469	1.25543	0.371251	66.0419	354.874		66	0.546128	0.154682	-	0.257559	0.05342	1.10317	-	0.686812	0.416358
	68	0.623388	0.156829	0.00565767	0.29073	0.06996	0.958598	0.3422	0.591976	0.366622	72.8281	353.411		68	0.435366	0.0904006	0.00370074	0.202265	0.0510128	0.917173	0.306865	0.564814	0.352359	72.9039	279.38		68	0.641197	0.108573	0.00809777	0.405642	0.047655	1.58769	0.721782	1.21255	0.375142	66.3964	359.185		68	0.542892	0.156679	-	0.251726	0.05356	1.08873	-	0.669502	0.419223
	70	0.608659	0.158081	0.00239921	0.283505	0.07	0.935096	0.144745	0.576934	0.358161	72.8529	356.029		70	0.430673	0.0908708	0.00483868	0.193415	0.05123	0.89528	0.399896	0.53781	0.35747	73.5684	279.643		70	0.618659	0.110825	0.00756092	0.379824	0.047704	1.51512	0.672908	1.13421	0.380915	67.062	366.256		70	0.536312	0.15767	-	0.247326	0.0537	1.07115	-	0.656083	0.415067
	72	0.60617	0.159671	0.00448891	0.27426	0.07004	0.923504	0.271005	0.557802	0.365702	73.4237	359.404		72	0.429439	0.0923838	0.00549128	0.184991	0.0514448	0.879399	0.452172	0.51224	0.367159	74.3705	283.112		72	0.603222	0.111444	0.00677095	0.362227	0.0477526	1.46515	0.601556	1.08056	0.384595	67.5498	367.928		72	0.533698	0.158432	-	0.240951	0.05384	1.05714	-	0.637511	0.41963
	74	0.597455	0.160675	0.0021328	0.268819	0.07008	0.908367	0.128504	0.546424	0.361944	73.532	361.457		74	0.428639	0.0924915	0.00503437	0.179714	0.0516572	0.868168	0.41268	0.495582	0.372586	74.8832	282.276		74	0.589435	0.113013	0.00761181	0.345862	0.047801	1.41962	0.676084	1.0307	0.388919	68.0543	372.731		74	0.529981	0.158763	-	0.239304	0.05398	1.04709	-	0.631512	0.415581
	76	0.595623	0.161821	0.00282071	0.26707	0.07012	0.904239	0.169926	0.542559	0.36168	73.5993	363.829		76	0.428273	0.0923821	0.00466525	0.177616	0.0518672	0.861564	0.380752	0.487813	0.373751	75.0875	280.801		76	0.572149	0.113324	0.00499881	0.32889	0.047849	1.36766	0.442511	0.979134	0.388522	68.4995	373.381		76	0.524741	0.159946	-	0.234965	0.05412	1.03177	-	0.618456	0.413316
	78	0.589955	0.164223	0.00321851	0.261355	0.07016	0.892288	0.193826	0.530646	0.361642	73.8331	369.018		78	0.427809	0.0937761	0.00538409	0.173917	0.0520748	0.852978	0.437919	0.475749	0.377229	75.459	283.902		78	0.556981	0.114671	0.00378778	0.311547	0.0478966	1.31879	0.33461	0.926581	0.392206	69.0856	377.445		78	0.519383	0.161118	-	0.231519	0.05426	1.01739	-	0.607814	0.409579
	80	0.584894	0.163627	0.00410437	0.257199	0.0702	0.882421	0.247166	0.521911	0.36051	73.976	367.469		80	0.427688	0.0937859	0.00590979	0.170833	0.05228	0.845751	0.478989	0.465478	0.380273	75.7836	282.817		80	0.542488	0.116202	0.00491377	0.297896	0.047944	1.27595	0.434084	0.885104	0.39085	69.4781	382.105		80	0.518658	0.162296	-	0.22727	0.0544	1.00883	-	0.595123	0.413712
	82	0.57905	0.165705	0.00463364	0.249736	0.07024	0.86874	0.278968	0.506479	0.362261	74.3478	371.925		82	0.426584	0.0939163	0.00475123	0.16874	0.0524828	0.838337	0.383231	0.458001	0.380336	75.9619	282.116		82	0.527671	0.116231	0.00434162	0.278667	0.047991	1.2254	0.382968	0.82716	0.39824	70.2995	381.826		82	0.51881	0.163988	-	0.225293	0.05454	1.00419	-	0.588433	0.415759
	84	0.57294	0.167242	0.00393089	0.24975	0.07028	0.861447	0.236423	0.506219	0.355228	74.1439	375.161		84	0.425699	0.0958301	0.00512738	0.167807	0.0526832	0.832721	0.412117	0.453735	0.378987	76.0252	286.77		84	0.511509	0.117376	0.00288465	0.261921	0.0480378	1.176	0.253874	0.776698	0.399302	70.9399	385.213		84	0.518661	0.166651	-	0.22309	0.05468	0.998882	-	0.581188	0.417695
	86	0.571028	0.167945	0.00369315	0.245504	0.07032	0.855042	0.221966	0.497329	0.357713	74.4077	376.523		86	0.42696	0.0949328	0.00608325	0.165813	0.0528812	0.829109	0.487484	0.446666	0.382443	76.2959	283.021		86	0.501943	0.117631	0.00322823	0.250727	0.0480842	1.14469	0.283923	0.742785	0.401901	71.4485	385.677		86	0.516504	0.168237	-	0.22243	0.05482	0.992493	-	0.577987	0.414506
	88	0.568493	0.170067	0.00212929	0.242469	0.07036	0.849029	0.127782	0.490901	0.358128	74.5596	381.063		88	0.428062	0.0962692	0.00547834	0.164082	0.0530768	0.825636	0.43717	0.440374	0.385262	76.5315	285.947		88	0.490923	0.11941	0.00594785	0.237836	0.0481302	1.10886	0.523873	0.703921	0.404943	72.0682	391.135		88	0.513997	0.168809	-	0.222561	0.05496	0.986542	-	0.576855	0.409686
	90	0.564111	0.17151	0.00396084	0.242784	0.0704	0.843951	0.237822	0.49126	0.352691	74.3878	384.079		90	0.426557	0.097459	0.00347445	0.162527	0.05327	0.818598	0.275808	0.434616	0.383982	76.6392	288.431		90	0.487144	0.119139	0.00259796	0.231322	0.048176	1.09319	0.227927	0.683991	0.409199	72.4699	389.878		90	0.514252	0.170655	-	0.219888	0.0551	0.981356	-	0.568478	0.412878
	92	0.562718	0.171994	0.00486763	0.240543	0.07044	0.839929	0.292262	0.486449	0.35348	74.5172	384.944		92	0.427213	0.0965013	0.00279951	0.161939	0.0534608	0.815948	0.221316	0.431499	0.38445	76.7314	284.578		92	0.481635	0.119329	0.00316731	0.224742	0.0482214	1.07466	0.277755	0.663909	0.410747	72.8174	390.129		92	0.517451	0.170106	-	0.220968	0.05524	0.984631	-	0.569823	0.414808
	94	0.55983	0.174388	0.00199401	0.237662	0.07048	0.833679	0.119449	0.48035	0.353329	74.648	390.081		94	0.428529	0.097331	0.00288453	0.163073	0.0536492	0.816329	0.227249	0.432995	0.383334	76.6616	286.017		94	0.476911	0.121031	0.00333068	0.219287	0.0482666	1.0589	0.29185	0.647188	0.411711	73.1077	395.326		94	0.516401	0.172425	-	0.220234	0.05538	0.979826	-	0.566496	0.413331
	96	0.555794	0.176048	0.00385226	0.232746	0.07052	0.824352	0.230893	0.470147	0.354205	74.9058	393.571		96	0.424819	0.0969236	0.0014972	0.161187	0.0538352	0.805914	0.117416	0.426508	0.379406	76.7142	283.835		96	0.47352	0.121609	0.00297607	0.213744	0.0483114	1.04523	0.260453	0.630244	0.414983	73.4692	396.845		96	0.520145	0.171672	-	0.219148	0.05552	0.981413	-	0.562281	0.419132
	98	0.554396	0.176189	0.00362138	0.22942	0.07056	0.819378	0.216901	0.463167	0.356212	75.1283	393.663		98	0.424815	0.0999016	0.00175691	0.160742	0.0540188	0.802653	0.137342	0.423886	0.378767	76.7633	291.562		98	0.470755	0.120461	0.00302958	0.211022	0.0483558	1.03626	0.264905	0.621647	0.414612	73.6046	392.738		98	0.519318	0.172729	-	0.218429	0.05566	0.976971	-	0.559026	0.417945
	100	0.550951	0.177598	0.00366163	0.230464	0.0706	0.816018	0.219193	0.46501	0.351008	74.9265	396.586		100	0.423928	0.0991874	-0.000296099	0.159214	0.0542	0.79692	-0.0230325	0.418453	0.378468	76.8962	288.51		100	0.470231	0.121135	0.0051779	0.207224	0.0484	1.02955	0.453194	0.609901	0.419645	73.9345	394.572		100	0.518501	0.173354	-	0.217649	0.0558	0.972497	-	0.555632	0.416865
	102	0.54873	0.179437	0.00412873	0.226958	0.07064	0.809982	0.247084	0.457677	0.352304	75.138	400.464		102	0.423266	0.0995015	0.00110311	0.158881	0.0543788	0.792963	0.0856179	0.416204	0.376759	76.9056	288.472		102	0.467789	0.122048	0.00430809	0.20727	0.0484438	1.02472	0.376433	0.609483	0.415241	73.8298	397.186		102	0.518044	0.174599	-	0.215986	0.05594	0.967559	-	0.550005	0.417554
	104	0.548972	0.179205	0.00387151	0.228464	0.07068	0.811128	0.231523	0.460453	0.350675	75.0225	399.721		104	0.423187	0.101306	0.0016766	0.157626	0.0545552	0.788844	0.129766	0.411581	0.377262	77.0429	292.755		104	0.467034	0.122366	0.00417736	0.203996	0.0484874	1.01835	0.364639	0.599318	0.419034	74.1052	397.863		104	0.519402	0.176152	-	0.216873	0.05608	0.968032	-	0.550886	0.417147
	106	0.550124	0.180623	0.00495957	0.222313	0.07072	0.806493	0.296616	0.447802	0.35869	75.5692	402.656		106	0.422658	0.100478	-0.00086491	0.158681	0.0547292	0.786786	-0.0665988	0.413018	0.373768	76.9025	289.437		106	0.46393	0.123341	0.00417326	0.203953	0.0485306	1.01238	0.363954	0.598659	0.41372	73.9811	400.678		106	0.518146	0.177678	-	0.21478	0.05622	0.961538	-	0.54421	0.417327
	108	0.544064	0.181704	0.00557528	0.221152	0.07076	0.798299	0.333375	0.445212	0.353087	75.4612	404.837		108	0.420857	0.100833	-0.000197366	0.156421	0.0549008	0.779176	-0.0151576	0.405863	0.373313	77.0809	289.554		108	0.458948	0.12374	0.0040035	0.202525	0.0485734	1.00161	0.348788	0.593943	0.407665	73.9085	401.62		108	0.515338	0.17861	-	0.216166	0.05636	0.956786	-	0.546361	0.410425
	110	0.547434	0.181385	0.00430586	0.220291	0.0708	0.800815	0.257128	0.443229	0.357586	75.6472	403.899		110	0.420067	0.103664	-0.00133347	0.155006	0.05507	0.774048	-0.102006	0.400957	0.373091	77.208	296.767		110	0.459264	0.123121	0.00411828	0.200243	0.048616	0.998298	0.358509	0.586737	0.411561	74.1396	399.262		110	0.515836	0.180636	-	0.212713	0.0565	0.951276	-	0.536302	0.414975
	112	0.543391	0.181919	0.00292197	0.21742	0.07084	0.793351	0.174244	0.437205	0.356146	75.7522	404.858		112	0.421071	0.101908	-0.00160667	0.155342	0.0552368	0.773517	-0.122509	0.400614	0.372903	77.2119	290.86		112	0.452276	0.121826	0.00550631	0.200207	0.0486582	0.986133	0.479508	0.586122	0.400011	73.848	394.718		112	0.516026	0.182643	-	0.214018	0.05664	0.950632	-	0.538259	0.412374
	114	0.541561	0.182884	0.00405156	0.214976	0.07088	0.788719	0.241631	0.432046	0.356673	75.8976	406.776		114	0.417792	0.102711	-0.00118978	0.1531	0.0554012	0.764047	-0.0904813	0.393659	0.370388	77.3299	292.28		114	0.452815	0.123343	0.00281433	0.197035	0.0487002	0.982068	0.244292	0.576338	0.405731	74.1781	399.289		114	0.516475	0.183547	-	0.214003	0.05678	0.948891	-	0.536894	0.411997
	116	0.541573	0.184458	0.0035857	0.215736	0.07092	0.78896	0.213667	0.433329	0.35563	75.8334	410.045		116	0.418942	0.10353	-0.00347977	0.153043	0.0555632	0.763377	-0.263405	0.392364	0.371013	77.3847	293.754		116	0.449114	0.12409	0.00306858	0.196272	0.0487418	0.9743	0.266193	0.573616	0.400684	74.0951	401.365		116	0.515595	0.184218	-	0.21521	0.05692	0.946676	-	0.538595	0.40808
	118	0.540578	0.185005	0.0028232	0.211414	0.07096	0.783599	0.168059	0.424408	0.35919	76.169	411.029		118	0.420061	0.102783	-0.00253978	0.152791	0.0557228	0.76248	-0.191838	0.390597	0.371883	77.46	290.797		118	0.44631	0.123681	0.00221948	0.195483	0.048783	0.967958	0.19223	0.570827	0.397131	74.0522	399.704		118	0.51337	0.185994	-	0.216453	0.05706	0.942662	-	0.540376	0.402286
	120	0.538911	0.185638	0.00434696	0.212401	0.071	0.782189	0.258855	0.426149	0.35604	76.0281	412.204		120	0.414282	0.103079	0.000750981	0.151159	0.05588	0.750402	0.0567052	0.385338	0.365064	77.4056	290.814		120	0.442755	0.124296	0.00313134	0.195726	0.048824	0.961754	0.271194	0.571056	0.390697	73.8743	401.353		120	0.513611	0.187352	-	0.213074	0.0572	0.936984	-	0.530639	0.406345
	122	0.537728	0.185838	0.00359374	0.20972	0.07104	0.778079	0.213785	0.420534	0.357545	76.219	412.416		122	0.415818	0.103961	0.00075322	0.151805	0.0560348	0.751199	0.0567171	0.385917	0.365283	77.3957	292.492		122	0.443383	0.123951	0.00440197	0.19387	0.0488646	0.95958	0.381342	0.565171	0.39441	74.085	399.907		122	0.513737	0.187119	-	0.213543	0.05734	0.93538	-	0.530509	0.404871
	124	0.539539	0.186816	0.00302174	0.209494	0.07108	0.779438	0.179595	0.419845	0.359593	76.2993	414.352		124	0.414967	0.104248	0.00108808	0.151511	0.0561872	0.747647	0.0817305	0.384123	0.363524	77.3939	292.505		124	0.44037	0.124329	0.00529851	0.195084	0.048905	0.955518	0.458989	0.568242	0.387276	73.8334	400.795		124	0.515225	0.187175	-	0.213077	0.05748	0.934621	-	0.528061	0.406561
	126	0.535975	0.187568	0.00327485	0.207908	0.07112	0.773675	0.194558	0.416432	0.357244	76.317	415.786		126	0.413428	0.105103	0.00156158	0.152426	0.0563372	0.744533	0.117026	0.385413	0.35912	77.2231	294.119		126	0.438746	0.125352	0.00253624	0.194219	0.048945	0.951028	0.218997	0.565259	0.38577	73.8479	403.762		126	0.518995	0.188071	-	0.212328	0.05762	0.936662	-	0.524927	0.411735
	128	0.535513	0.188688	0.00245867	0.208402	0.07116	0.773167	0.145916	0.417186	0.355981	76.2584	418.035		128	0.413424	0.106412	0.00151684	0.150215	0.0564848	0.740129	0.113372	0.37883	0.361299	77.4789	297.003		128	0.438631	0.126193	0.005477	0.192896	0.0489846	0.948383	0.473749	0.560956	0.387427	73.9746	406.143		128	0.521311	0.18832	-	0.210764	0.05776	0.935836	-	0.519797	0.416039
	130	0.531989	0.188397	0.00218592	0.206501	0.0712	0.767181	0.129635	0.413149	0.354032	76.3047	417.155		130	0.413002	0.106746	0.00372027	0.150987	0.05663	0.738502	0.277805	0.379803	0.3587	77.3714	297.172		130	0.437405	0.126155	0.00349204	0.191571	0.049024	0.943968	0.30129	0.556654	0.387314	74.0534	405.693		130	0.519462	0.189843	-	0.212075	0.0579	0.932491	-	0.521766	0.410725
	132	0.532489	0.189813	0.00457316	0.205538	0.07124	0.766454	0.271442	0.410992	0.355462	76.4061	420.054		132	0.412444	0.106921	0.00398705	0.148773	0.0567728	0.733431	0.297034	0.373291	0.36014	77.6055	296.912		132	0.43841	0.128215	0.00301908	0.192026	0.049063	0.945403	0.260168	0.557533	0.38787	74.0518	411.991		132	0.52066	0.190731	-	0.21134	0.05804	0.931065	-	0.518703	0.412363
	134	0.531178	0.190954	0.00261583	0.205316	0.07128	0.764387	0.154996	0.410317	0.354069	76.3811	422.342		134	0.412652	0.108154	0.00309535	0.148829	0.0569132	0.731971	0.229879	0.372512	0.359459	77.6077	299.593		134	0.436441	0.127726	0.00482089	0.191507	0.0491018	0.940852	0.41576	0.555586	0.385266	74.0174	410.097		134	0.522415	0.190907	-	0.210909	0.05818	0.930723	-	0.516399	0.414324
	136	0.53095	0.191662	0.00203673	0.204355	0.07132	0.762864	0.120573	0.408168	0.354696	76.4579	423.671		136	0.414283	0.109118	0.00289775	0.149219	0.0570512	0.732868	0.214651	0.372584	0.360283	77.6307	301.533		136	0.436032	0.12831	0.00435938	0.190173	0.0491402	0.937764	0.375514	0.551287	0.386477	74.1336	411.65		136	0.525258	0.191224	-	0.209669	0.05832	0.930975	-	0.51213	0.418845
	138	0.52959	0.192912	0.00354092	0.203836	0.07136	0.760486	0.20969	0.406902	0.353584	76.4576	426.195		138	0.410978	0.108617	0.00371811	0.149836	0.0571868	0.727278	0.274932	0.373237	0.354041	77.4193	299.438		138	0.433787	0.129812	0.00338457	0.189474	0.0491782	0.93257	0.291071	0.548833	0.383737	74.1053	416.145		138	0.523734	0.191736	-	0.210989	0.05846	0.928119	-	0.514121	0.413999
	140	0.531234	0.19344	0.00332948	0.202512	0.0714	0.760702	0.197033	0.404032	0.35667	76.6302	427.122		140	0.412098	0.108092	0.00630121	0.149869	0.05732	0.727155	0.465745	0.372451	0.354704	77.4631	297.297		140	0.434852	0.130233	0.0036799	0.188681	0.049216	0.932541	0.316308	0.546118	0.386424	74.2326	417.174		140	0.525602	0.193368	-	0.211993	0.0586	0.929473	-	0.515333	0.41414
	142	0.532485	0.194825	0.00278207	0.202518	0.07144	0.761653	0.164492	0.403818	0.357835	76.6718	429.939		142	0.411769	0.10904	0.00728821	0.150317	0.0574508	0.72554	0.537862	0.372714	0.352826	77.3969	299.222		142	0.434921	0.129808	0.00500854	0.188124	0.0492534	0.931233	0.430678	0.544091	0.387142	74.2921	415.497		142	0.525817	0.193359	-	0.211974	0.05874	0.927525	-	0.514059	0.413466
	144	0.531881	0.195503	0.00357394	0.202434	0.07148	0.760492	0.211293	0.403426	0.357066	76.6589	431.194		144	0.413523	0.109375	0.00668558	0.14836	0.0575792	0.724177	0.492061	0.367041	0.357136	77.6991	299.471		144	0.436059	0.13077	0.00311095	0.18694	0.0492906	0.930835	0.266866	0.540261	0.390574	74.4622	418.26		144	0.526121	0.194556	-	0.211835	0.05888	0.925576	-	0.512501	0.413075
	146	0.530699	0.196925	0.00244245	0.201562	0.07152	0.758007	0.144221	0.401462	0.356545	76.6964	434.087		146	0.414924	0.108909	0.0082932	0.150919	0.0577052	0.727277	0.609772	0.372556	0.354721	77.4605	297.545		146	0.436674	0.131611	0.00145284	0.186422	0.0493274	0.930458	0.124358	0.538361	0.392097	74.5417	420.638		146	0.5257	0.194421	-	0.213354	0.05902	0.924434	-	0.514951	0.409483
	148	0.530493	0.197643	0.0026405	0.201935	0.07156	0.757685	0.155846	0.401981	0.355703	76.6563	435.427		148	0.414698	0.110711	0.00702183	0.146886	0.0578288	0.721047	0.514696	0.361828	0.35922	77.9204	301.821		148	0.434179	0.132313	0.00173527	0.187298	0.0493638	0.926923	0.148459	0.540492	0.386431	74.3435	422.568		148	0.521578	0.19433	-	0.211808	0.05916	0.91515	-	0.510009	0.405141
	150	0.526538	0.196758	0.00400746	0.200855	0.0716	0.751988	0.236586	0.399608	0.35238	76.6183	433.235		150	0.414354	0.110608	0.00751447	0.14827	0.05795	0.720571	0.549849	0.364473	0.356098	77.7443	300.91		150	0.438145	0.133229	0.00123045	0.185584	0.0494	0.930361	0.105147	0.535153	0.395208	74.6907	425.183		150	0.522255	0.196098	-	0.213353	0.0593	0.915516	-	0.512516	0.403
	152	0.529625	0.198056	0.00410129	0.200076	0.07164	0.754262	0.242003	0.397835	0.356427	76.7922	435.85		152	0.415065	0.110936	0.00802049	0.147263	0.0580688	0.718968	0.585886	0.361256	0.357712	77.8915	301.184		152	0.439302	0.132171	0.00371014	0.184555	0.0494358	0.930215	0.317492	0.5318	0.398416	74.8454	421.501		152	0.523055	0.196879	-	0.212498	0.05944	0.913513	-	0.50926	0.404252
	154	0.531854	0.198638	0.00511507	0.199409	0.07168	0.755695	0.301835	0.396288	0.359407	76.9263	436.886		154	0.417654	0.112055	0.00820034	0.148451	0.0581852	0.722297	0.597899	0.363443	0.358854	77.8602	303.615		154	0.438557	0.132782	0.00142236	0.184815	0.0494714	0.928696	0.121391	0.532167	0.396529	74.7868	423.146		154	0.524226	0.196445	-	0.214237	0.05958	0.914737	-	0.512223	0.402513
	156	0.533629	0.198728	0.00284421	0.197163	0.07172	0.75525	0.167515	0.391606	0.363644	77.1855	436.839		156	0.419208	0.111952	0.00946559	0.148536	0.0582992	0.723064	0.689435	0.36294	0.360124	77.9143	302.742		156	0.437226	0.134134	0.00227614	0.185046	0.0495066	0.926221	0.19426	0.532452	0.393769	74.7059	427.151		156	0.519951	0.197392	-	0.21279	0.05972	0.905465	-	0.50757	0.397895
	158	0.52932	0.198842	0.0053227	0.197707	0.07176	0.750598	0.313775	0.392467	0.358131	76.9936	436.846		158	0.418728	0.111324	0.00748486	0.148668	0.0584108	0.72118	0.543325	0.362568	0.358613	77.8793	300.47		158	0.436707	0.134692	0.00106917	0.182559	0.0495414	0.921603	0.0910911	0.524928	0.396676	74.9384	428.624		158	0.524423	0.198034	-	0.214156	0.05986	0.91063	-	0.509634	0.400996
	160	0.527611	0.196577	0.00426054	0.198394	0.0718	0.748916	0.250862	0.393612	0.355304	76.8747	431.631		160	0.419073	0.112853	0.00969991	0.146859	0.05852	0.718359	0.703939	0.357487	0.360872	78.1036	304.027		160	0.438796	0.134751	0.00124839	0.183526	0.049576	0.925484	0.106303	0.527338	0.398145	74.9289	428.513		160	0.526048	0.198708	-	0.216307	0.06	0.912874	-	0.51355	0.399324
	162	0.527192	0.197459	0.00367313	0.195826	0.07184	0.745801	0.216079	0.3883	0.357501	77.0915	433.325		162	0.422945	0.111744	0.00776723	0.146882	0.0586268	0.722248	0.56185	0.356892	0.365357	78.2578	300.491		162	0.438129	0.135485	0.000608031	0.182468	0.0496102	0.922455	0.0517109	0.523937	0.398518	75.0088	430.549		162	0.525109	0.199344	-	0.214369	0.06014	0.907506	-	0.507765	0.399741
	164	0.52219	0.199057	0.00405048	0.196776	0.07188	0.740764	0.238198	0.389968	0.350795	76.8366	436.59		164	0.426184	0.112501	0.00628151	0.147674	0.0587312	0.726131	0.453076	0.358179	0.367952	78.2961	301.988		164	0.439321	0.135105	0.00235493	0.182863	0.0496442	0.924205	0.20044	0.524712	0.399492	75.0192	429.05		164	0.526838	0.20036	-	0.214269	0.06028	0.907541	-	0.506349	0.401193
	166	0.521506	0.199246	0.00489161	0.196774	0.07192	0.739604	0.287645	0.389747	0.349857	76.8134	436.761		166	0.427885	0.113032	0.00590803	0.147875	0.0588332	0.727351	0.42528	0.358044	0.369307	78.3407	302.888		166	0.439079	0.135299	0.00342434	0.181121	0.0496778	0.921	0.291532	0.519362	0.401637	75.1879	429.374		166	0.529834	0.200568	-	0.214762	0.06042	0.909836	-	0.50634	0.403497
	168	0.520845	0.199032	0.00553652	0.19558	0.07196	0.737433	0.325511	0.387167	0.350266	76.8991	436.048		168	0.432354	0.11431	0.00763105	0.147877	0.0589328	0.732066	0.549063	0.357444	0.374622	78.5162	305.797		168	0.439652	0.136344	0.00226799	0.181771	0.049711	0.922106	0.192766	0.520877	0.401229	75.1454	432.401		168	0.528393	0.200686	-	0.214619	0.06056	0.90572	-	0.504831	0.400889
	170	0.524242	0.199772	0.00392994	0.194467	0.072	0.739751	0.230707	0.384749	0.355002	77.1153	437.428		170	0.43163	0.116129	0.00646951	0.148092	0.05903	0.730128	0.464326	0.357375	0.372753	78.4634	310.151		170	0.438394	0.135431	0.00122094	0.180786	0.049744	0.918273	0.103611	0.517712	0.400562	75.1933	429.221		170	0.534047	0.202387	-	0.214077	0.0607	0.910369	-	0.502396	0.407973
	172	0.523198	0.200211	0.00237156	0.197937	0.07204	0.741224	0.139017	0.391396	0.349827	76.7662	438.146		172	0.432211	0.115717	0.0062412	0.148946	0.0591248	0.730632	0.447145	0.358859	0.371773	78.3889	308.554		172	0.438123	0.13623	0.000883207	0.179613	0.0497766	0.915767	0.07488	0.514015	0.401752	75.3031	431.469		172	0.534326	0.203636	-	0.214801	0.06084	0.909379	-	0.502933	0.406446
	174	0.523323	0.199886	0.00441882	0.194141	0.07208	0.737648	0.259193	0.383677	0.35397	77.114	437.192		174	0.436567	0.116602	0.00528193	0.146861	0.0592172	0.733048	0.377564	0.353283	0.379765	78.7948	310.429		174	0.436699	0.136618	0.00121386	0.181293	0.049809	0.915047	0.102875	0.518486	0.396561	75.0686	432.419		174	0.532289	0.204953	-	0.214715	0.06098	0.904586	-	0.501579	0.403007
	176	0.524016	0.201199	0.00391448	0.193583	0.07212	0.737506	0.229414	0.382362	0.355144	77.1881	439.819		176	0.437147	0.116426	0.00161537	0.147652	0.0593072	0.733538	0.114992	0.354647	0.378891	78.7271	309.489		176	0.437639	0.137468	0.00206501	0.18096	0.049841	0.915518	0.175025	0.517201	0.398317	75.1432	434.83		176	0.533096	0.205408	-	0.214398	0.06112	0.903223	-	0.49969	0.403532
	178	0.523316	0.202229	0.00320899	0.195893	0.07216	0.738344	0.187885	0.386712	0.351633	76.9548	441.824		178	0.439535	0.117826	0.00386004	0.146533	0.0593948	0.734425	0.274816	0.351439	0.382986	78.945	312.75		178	0.435225	0.136482	0.00349525	0.179845	0.0498726	0.909743	0.296421	0.513688	0.396055	75.1553	431.436		178	0.53283	0.205913	-	0.214169	0.06126	0.900585	-	0.498018	0.402568
	180	0.52483	0.202088	0.00340987	0.196732	0.0722	0.740306	0.199559	0.388152	0.352155	76.9303	441.273		180	0.441599	0.118039	0.00405912	0.146879	0.05948	0.736458	0.288616	0.351767	0.384691	78.9835	312.866		180	0.43306	0.137679	0.0029578	0.180698	0.049904	0.906844	0.250568	0.515801	0.391043	74.9734	434.946		180	0.530552	0.204713	-	0.214368	0.0614	0.895828	-	0.497343	0.398484
	182	0.521899	0.202522	0.00331183	0.196919	0.07224	0.73688	0.193703	0.388307	0.348573	76.8137	441.976		182	0.442807	0.117668	0.00396659	0.147385	0.0595628	0.737555	0.281625	0.352487	0.385067	78.9718	311.45		182	0.43336	0.136115	0.00215583	0.179081	0.049935	0.904722	0.182392	0.510868	0.393854	75.1546	429.738		182	0.530256	0.20548	-	0.213653	0.06154	0.892684	-	0.494556	0.398128
	184	0.527499	0.202552	0.00254104	0.196742	0.07228	0.742389	0.148471	0.387742	0.354647	77.0193	441.795		184	0.445686	0.118314	0.00267897	0.147569	0.0596432	0.740536	0.189774	0.352451	0.388085	79.0586	312.736		184	0.432851	0.137267	0.00450023	0.177147	0.0499658	0.90094	0.381263	0.505039	0.395901	75.335	433.108		184	0.531968	0.207023	-	0.215621	0.06168	0.894832	-	0.497978	0.396854
	186	0.525353	0.203932	0.00428519	0.19703	0.07232	0.739902	0.250498	0.388096	0.351807	76.921	444.561		186	0.44749	0.119686	0.002384	0.14634	0.0597212	0.740644	0.168622	0.349059	0.391585	79.2632	315.951		186	0.429084	0.136481	0.00133939	0.177611	0.0499962	0.895073	0.113101	0.506055	0.389018	75.1233	430.366		186	0.530453	0.206573	-	0.216849	0.06182	0.892132	-	0.499682	0.39245
	188	0.525639	0.202704	0.00367364	0.197238	0.07236	0.739983	0.214553	0.388289	0.351694	76.912	441.639		188	0.44739	0.118819	-0.00138984	0.148502	0.0597968	0.741844	0	0.353769	0.388075	79.0174	313.266		188	0.427377	0.137503	0.0043815	0.178609	0.0500262	0.89311	0.370716	0.508591	0.384519	74.9437	433.33		188	0.529688	0.206459	-	0.216055	0.06196	0.888346	-	0.496727	0.391619
	190	0.523148	0.203466	0.00568876	0.196135	0.0724	0.735924	0.332452	0.385905	0.350019	76.9272	443.054		190	0.451396	0.119278	1.28467e-05	0.148564	0.05987	0.746244	0.000904875	0.353484	0.39276	79.1579	314.09		190	0.426962	0.136787	0.00323096	0.177255	0.050056	0.890235	0.272939	0.504435	0.385799	75.0682	430.817		190	0.53165	0.206853	-	0.214281	0.0621	0.887027	-	0.491537	0.395491
	192	0.527817	0.205891	0.00350946	0.196636	0.07244	0.741002	0.204718	0.386678	0.354323	77.0394	448.087		192	0.45219	0.119843	0.000878326	0.148172	0.0599408	0.74599	0.0618309	0.352133	0.393857	79.2305	315.204		192	0.422346	0.137261	0.00289848	0.176531	0.0500854	0.881585	0.24464	0.502082	0.379503	74.941	432.055		192	0.530437	0.205907	-	0.215492	0.06224	0.884724	-	0.493202	0.391521
	194	0.526467	0.206517	0.00147649	0.196192	0.07248	0.738749	0.0859781	0.385592	0.353157	77.0341	449.202		194	0.456643	0.120355	0.00111945	0.147921	0.0600092	0.750692	0.0787286	0.351136	0.399556	79.419	316.191		194	0.423317	0.137554	0.00345437	0.174128	0.0501146	0.879586	0.291525	0.49496	0.384626	75.2403	432.726		194	0.529561	0.205606	-	0.216273	0.06238	0.882423	-	0.493879	0.388544
	196	0.524295	0.206413	0.004128	0.195711	0.07252	0.735579	0.24062	0.384434	0.351145	77.0044	448.728		196	0.455645	0.119733	-0.00167739	0.148145	0.0600752	0.748798	0	0.351281	0.397517	79.3584	314.213		196	0.420709	0.138115	0.0014304	0.173978	0.0501434	0.874817	0.12044	0.494247	0.38057	75.1413	434.241		196	0.527166	0.2041	-	0.214349	0.06252	0.875517	-	0.48839	0.387127
	198	0.525302	0.206793	0.00379209	0.197807	0.07256	0.738071	0.220874	0.388337	0.349734	76.8493	449.307		198	0.457786	0.119916	0.00136969	0.14787	0.0601388	0.75051	0.0961365	0.350259	0.40025	79.4654	314.36		198	0.42095	0.137546	0.00295332	0.176508	0.0501718	0.877858	0.248849	0.501152	0.376706	74.8813	432.206		198	0.524681	0.203101	-	0.212997	0.06266	0.8691	-	0.484224	0.384876
	200	0.529176	0.206733	0.00329734	0.195612	0.0726	0.73995	0.191895	0.383816	0.356134	77.177	448.928		200	0.46301	0.121617	-0.000809875	0.147498	0.0602	0.756159	0	0.349022	0.407136	79.6908	318.495		200	0.419932	0.138346	0.0021054	0.17576	0.0502	0.874842	0.177176	0.498747	0.376094	74.9156	434.477		200	0.526344	0.202096	-	0.213993	0.0628	0.870233	-	0.485405	0.384828
	202	0.529346	0.206439	0.00276219	0.193268	0.07264	0.737703	0.160613	0.379007	0.358696	77.3943	448.042		202	0.461078	0.122632	-0.00150636	0.148584	0.0602588	0.754038	0	0.351249	0.402788	79.5037	320.84		202	0.41918	0.139344	0.00275337	0.172639	0.0502278	0.86929	0.231703	0.489621	0.37967	75.2174	437.368		202	0.521441	0.201723	-	0.212047	0.06294	0.860256	-	0.47992	0.380336
	204	0.529348	0.208331	0.00407925	0.194793	0.07268	0.738615	0.237247	0.381788	0.356827	77.2565	451.9		204	0.466535	0.123252	-0.00293903	0.149542	0.0603152	0.761416	0	0.353183	0.408233	79.5906	322.16		204	0.419153	0.138577	0.00239722	0.173148	0.0502554	0.869406	0.201561	0.490794	0.378612	75.1613	434.722		204	0.519384	0.200693	-	0.21203	0.06308	0.855775	-	0.478816	0.376959
	206	0.531218	0.208993	0.002706	0.195994	0.07272	0.741259	0.157167	0.383931	0.357328	77.2104	453.087		206	0.471955	0.123937	0.000149865	0.150995	0.0603692	0.769279	0.0104697	0.356297	0.412982	79.6211	323.661		206	0.417912	0.139007	0.00108132	0.173269	0.0502826	0.867153	0.0907684	0.490872	0.376281	75.0928	435.835
	208	0.534558	0.209697	0.00357744	0.195046	0.07276	0.743632	0.207772	0.381865	0.361767	77.4054	454.364		208	0.47237	0.124125	-0.00143641	0.148992	0.0604208	0.767083	0	0.351271	0.415812	79.8511	323.874		208	0.416743	0.139479	0.00284477	0.172661	0.0503094	0.864112	0.239024	0.488888	0.375223	75.1061	437.083
	210	0.534937	0.20905	0.00399906	0.194831	0.0728	0.743446	0.232188	0.381234	0.362212	77.4371	452.713		210	0.470743	0.124978	-0.00206886	0.149256	0.06047	0.764624	0	0.351606	0.413018	79.767	325.835		210	0.417975	0.138966	0.00185597	0.171968	0.050336	0.86471	0.15573	0.486668	0.378042	75.2363	435.244
	212	0.533657	0.211047	0.00333209	0.196288	0.07284	0.742913	0.193281	0.383873	0.359041	77.2646	456.785		212	0.472457	0.125084	0.000425137	0.150406	0.0605168	0.767442	0.0296336	0.35404	0.413402	79.7017	325.859		212	0.416843	0.139077	0.00201554	0.171584	0.0503622	0.862021	0.169054	0.485328	0.376693	75.2275	435.366
	214	0.534721	0.209821	0.00327166	0.195714	0.07288	0.743156	0.189665	0.38254	0.360616	77.351	453.883		214	0.474678	0.125279	-0.0020821	0.148798	0.0605612	0.768089	0	0.349999	0.41809	79.9503	326.129		214	0.417454	0.138316	0.00359322	0.173315	0.0503882	0.864681	0.301627	0.489973	0.374708	75.0673	432.76
	216	0.534917	0.208553	0.00343276	0.197054	0.07292	0.744112	0.198914	0.384949	0.359163	77.2376	450.893		216	0.476278	0.125771	-0.00332102	0.149326	0.0606032	0.770172	0	0.350997	0.419174	79.9475	327.182		216	0.417419	0.138376	0.00258489	0.172529	0.0504138	0.86321	0.21669	0.487502	0.375707	75.1508	432.728
	218	0.537318	0.211105	0.00323253	0.196097	0.07296	0.74546	0.187187	0.382869	0.362591	77.4015	456.161		218	0.47898	0.126682	-0.000684841	0.146847	0.0606428	0.770598	0	0.344946	0.425652	80.3041	329.336		218	0.42082	0.138456	0.00259577	0.170548	0.050439	0.865599	0.217495	0.481664	0.383935	75.5161	432.762
	220	0.538399	0.210278	0.00281073	0.197648	0.073	0.747543	0.162633	0.385685	0.361858	77.2988	454.124		220	0.479666	0.128143	-0.00212783	0.1465	0.06068	0.770652	0	0.343919	0.426733	80.3641	332.93		220	0.421719	0.138981	0.00245839	0.172271	0.050464	0.868707	0.205858	0.48629	0.382417	75.3694	434.187
	222	0.537575	0.210846	0.00500657	0.193707	0.07304	0.742868	0.289897	0.377788	0.365079	77.6236	455.102		222	0.480866	0.128162	-0.000378943	0.146408	0.0607148	0.771663	0	0.343506	0.428158	80.4134	332.787		222	0.42345	0.13881	0.00219334	0.171563	0.0504886	0.87009	0.183533	0.484055	0.386035	75.5216	433.442
	224	0.539926	0.212057	0.00290674	0.197799	0.07308	0.748491	0.168012	0.385558	0.362933	77.335	457.465		224	0.484729	0.128057	-0.0024794	0.145633	0.0607472	0.775434	0	0.341505	0.433929	80.6222	332.34		224	0.425354	0.13903	0.00450724	0.169666	0.050513	0.870271	0.377707	0.478473	0.391798	75.8089	433.919
	226	0.538869	0.211087	0.00328169	0.196404	0.07312	0.745753	0.189622	0.382628	0.363125	77.4246	455.122		226	0.485606	0.128461	-0.00332932	0.146246	0.0607772	0.776814	0	0.342774	0.43404	80.5847	333.223		226	0.424128	0.13952	0.00419691	0.169453	0.050537	0.867692	0.351442	0.477644	0.390048	75.779	435.243
	228	0.536722	0.215125	0.00287212	0.194185	0.07316	0.741145	0.165826	0.378099	0.363046	77.5532	463.576		228	0.483668	0.129051	-0.00219288	0.146821	0.0608048	0.774558	0	0.343966	0.430591	80.4604	334.601		228	0.424889	0.1398	0.00436868	0.17007	0.0505606	0.869229	0.365707	0.479159	0.39007	75.7452	435.912
	230	0.536736	0.213237	0.00217848	0.19493	0.0732	0.741393	0.125659	0.379342	0.362051	77.4869	459.255		230	0.485169	0.128599	-0.00117947	0.146497	0.06083	0.775836	0	0.343063	0.432773	80.5439	333.291		230	0.425619	0.1388	0.00238036	0.167823	0.050584	0.867175	0.198837	0.47261	0.394564	76.02	432.594
	232	0.540132	0.213829	0.00372055	0.19235	0.07324	0.742413	0.214682	0.374118	0.368296	77.8275	460.279		232	0.488076	0.129075	0.000431749	0.144467	0.0608528	0.777197	0.0299285	0.338184	0.439013	80.8541	334.399		232	0.424694	0.139523	0.00286738	0.167132	0.050607	0.864492	0.239508	0.470451	0.394041	76.0555	434.649
	234	0.538165	0.214446	0.00580851	0.19284	0.07328	0.740323	0.335384	0.374866	0.365458	77.7204	461.357		234	0.485917	0.129299	0.00185311	0.146542	0.0608732	0.776294	0.128539	0.342926	0.433368	80.5631	334.866		234	0.421498	0.139115	0.00261941	0.167892	0.0506298	0.8601	0.218652	0.472377	0.387723	75.8347	433.182
	236	0.537858	0.215284	0.00238794	0.191987	0.07332	0.738863	0.137531	0.373005	0.365859	77.7872	462.906		236	0.488602	0.12934	0.00121985	0.146887	0.0608912	0.779875	0.0845517	0.343631	0.436244	80.6126	334.873		236	0.422551	0.139991	0.00206889	0.16534	0.0506522	0.85819	0.172541	0.464991	0.393199	76.1596	435.718
	238	0.538838	0.214781	0.00398803	0.19447	0.07336	0.741628	0.229774	0.377623	0.364005	77.596	461.573		238	0.48496	0.129129	0.00237571	0.14783	0.0609068	0.775961	0.164758	0.34575	0.430212	80.3947	334.241		238	0.42202	0.140713	0.00413511	0.166455	0.0506742	0.858374	0.345307	0.467922	0.390453	76.0145	437.775
	240	0.540861	0.214362	0.00273715	0.193969	0.0734	0.742955	0.157504	0.376443	0.366511	77.7059	460.422		240	0.486245	0.131731	0.00176272	0.147673	0.06092	0.777283	0.122168	0.345306	0.431977	80.4531	340.904		240	0.425609	0.140291	0.00494678	0.16382	0.050696	0.860295	0.413191	0.460317	0.399978	76.457	436.276
	242	0.538997	0.213066	0.00280145	0.193211	0.07344	0.739915	0.161121	0.374768	0.365147	77.7139	457.388		242	0.488972	0.132152	0.003901	0.145335	0.0609308	0.778247	0.27072	0.339779	0.438467	80.7898	341.934		242	0.422009	0.140786	7.12443e-05	0.16262	0.0507174	0.852887	0.0059241	0.456751	0.396136	76.4364	437.628
	244	0.537543	0.214854	0.00164953	0.192029	0.07348	0.736954	0.094756	0.372274	0.36468	77.7733	460.976		244	0.485084	0.132299	0.00464104	0.145029	0.0609392	0.772826	0.322199	0.339017	0.433809	80.6985	342.266		244	0.419593	0.141093	0.00217665	0.161648	0.0507386	0.8476	0.181235	0.453834	0.393766	76.4409	438.402
	246	0.538614	0.216022	0.00205135	0.189195	0.07352	0.735278	0.117801	0.36658	0.368698	78.0634	463.23		246	0.489414	0.132929	0.00269446	0.146455	0.0609452	0.779783	0.186787	0.342318	0.437465	80.6844	343.863		246	0.416942	0.140093	0.00175069	0.162428	0.0507594	0.844124	0.145656	0.455835	0.388289	76.2396	435.114
	248	0.541033	0.21471	0.00216994	0.188415	0.07356	0.736791	0.124552	0.364871	0.37192	78.2105	460.165		248	0.485722	0.13285	0.00393134	0.147595	0.0609488	0.776164	0.27275	0.344961	0.431203	80.4445	343.636		248	0.418405	0.140398	0.00184109	0.160786	0.0507798	0.844015	0.153127	0.451047	0.392968	76.4861	435.885
	250	0.538884	0.215697	0.0020281	0.191985	0.0736	0.737142	0.116338	0.37158	0.365562	77.8204	462.03		250	0.48529	0.133484	0.00893703	0.146702	0.06095	0.774675	0.622205	0.342867	0.431808	80.5258	345.269		250	0.414896	0.142108	0.000314333	0.160348	0.0508	0.837728	0.0261001	0.44964	0.388087	76.3835	441.02
	252	0.542968	0.215309	0.00180776	0.188993	0.07364	0.738541	0.103629	0.365592	0.372949	78.2191	460.947															252	0.413703	0.141004	0.00327768	0.159449	0.0508198	0.834452	0.272724	0.446943	0.387509	76.433	437.422
	254	0.542158	0.215784	0.00367399	0.191016	0.07368	0.738999	0.210721	0.369305	0.369694	78.0116	461.714															254	0.41493	0.141939	0.00240034	0.16031	0.0508394	0.837085	0.1995	0.449185	0.3879	76.3893	440.153
	256	0.539839	0.217115	0.00315591	0.188191	0.07372	0.733732	0.180854	0.363646	0.370086	78.1931	464.31															256	0.412681	0.141964	0.00100492	0.15877	0.0508586	0.831406	0.0833934	0.4447	0.386706	76.4654	440.066
	258	0.53826	0.215671	0.00283678	0.191481	0.07376	0.734452	0.162448	0.369801	0.364651	77.8457	460.971															258	0.412467	0.142524	0.00294028	0.157139	0.0508774	0.828758	0.244303	0.43997	0.388789	76.6414	441.638
	260	0.54216	0.216796	0.00279532	0.193906	0.0738	0.740254	0.159983	0.374281	0.365972	77.7531	463.125															260	0.411084	0.142517	0.00198128	0.158226	0.050896	0.827665	0.16443	0.442852	0.384813	76.4573	441.456
	262	0.540622	0.217264	0.00332291	0.190227	0.07384	0.735098	0.190133	0.366983	0.368116	78.0339	463.874															262	0.410595	0.142489	0.0019355	0.157007	0.0509142	0.825116	0.160567	0.439281	0.385835	76.5749	441.211
	264	0.541011	0.217211	0.00204649	0.189631	0.07388	0.734607	0.116948	0.365634	0.368974	78.1	463.509															264	0.410224	0.143356	0.00216957	0.157554	0.0509322	0.824928	0.179957	0.440657	0.384271	76.4962	443.74
	266	0.542525	0.218764	0.00210713	0.189874	0.07392	0.736021	0.120353	0.365905	0.370116	78.1259	466.57															266	0.409979	0.143229	0.00371053	0.156987	0.0509498	0.823569	0.308061	0.438921	0.384648	76.5502	443.193
	268	0.541978	0.217574	0.00251835	0.192207	0.07396	0.737019	0.143796	0.370199	0.36682	77.8991	463.782															268	0.410223	0.142733	0.00380712	0.155413	0.050967	0.821729	0.315999	0.434373	0.387357	76.7413	441.506
	270	0.539399	0.218881	0.00226166	0.189568	0.074	0.731656	0.12905	0.364921	0.366736	78.0546	466.316															270	0.410576	0.14435	0.00248813	0.15555	0.050984	0.822167	0.206224	0.43461	0.387556	76.7409	446.36
	272	0.54184	0.218582	0.00451264	0.19265	0.07404	0.736452	0.257685	0.370652	0.3658	77.8551	465.427															272	0.411065	0.144547	0.00263595	0.15716	0.0510006	0.824627	0.218431	0.438964	0.385663	76.578	446.824
	274	0.541226	0.218758	0.00198369	0.193505	0.07408	0.736129	0.113049	0.372097	0.364032	77.759	465.549															274	0.408891	0.144281	0.0032083	0.155978	0.051017	0.819574	0.265901	0.435526	0.384048	76.6181	445.859
	276	0.542103	0.219181	0.00322656	0.190349	0.07412	0.733989	0.183911	0.365829	0.36816	78.0699	466.198															276	0.410859	0.144861	0.0035152	0.155829	0.051033	0.822155	0.29132	0.434973	0.387182	76.7212	447.511
	278	0.541347	0.219391	0.00312649	0.194101	0.07416	0.735966	0.178101	0.372839	0.363127	77.7097	466.394															278	0.41011	0.144496	0.00505283	0.155824	0.0510486	0.820748	0.419158	0.434825	0.385922	76.6892	446.246
	280	0.542044	0.219112	0.00231065	0.192404	0.0742	0.734872	0.131494	0.36938	0.365492	77.8836	465.549															280	0.412092	0.145511	0.00184369	0.155835	0.051064	0.823555	0.152489	0.434726	0.388829	76.7739	449.248
	282	0.543635	0.220959	0.0031218	0.189297	0.07424	0.733532	0.177641	0.36322	0.370312	78.2127	469.221															282	0.411851	0.14553	0.00365629	0.156633	0.051079	0.823921	0.302774	0.436822	0.387098	76.6723	449.171
	284	0.541831	0.22065	0.00317918	0.192829	0.07428	0.734214	0.180814	0.369798	0.364416	77.8388	468.311															284	0.414347	0.146162	0.00324887	0.157563	0.0510938	0.828652	0.268867	0.439289	0.389363	76.6745	450.992
	286	0.541563	0.220698	0.00135885	0.191721	0.07432	0.732603	0.0771625	0.367475	0.365128	77.9295	468.162															286	0.415112	0.146562	0.00208599	0.155893	0.0511082	0.827543	0.172415	0.434512	0.393031	76.8973	452.099
	288	0.543599	0.219203	0.00247118	0.193586	0.07436	0.735926	0.140339	0.370851	0.365075	77.8273	464.741															288	0.416093	0.146177	0.00411101	0.154706	0.0511222	0.827364	0.340269	0.431085	0.396279	77.0745	450.789
	290	0.542328	0.221359	0.002997	0.192295	0.0744	0.733105	0.17016	0.36818	0.364925	77.9023	469.058															290	0.416365	0.146275	0.00365685	0.155911	0.051136	0.829034	0.302482	0.434324	0.394711	76.9488	450.97
	292	0.541106	0.221169	0.00368814	0.192603	0.07444	0.731683	0.20937	0.368571	0.363112	77.8358	468.404															292	0.418686	0.145823	0.00144994	0.156796	0.0511494	0.833457	0.119683	0.436675	0.396782	76.947	449.458
	294	0.541997	0.220549	0.0029676	0.195327	0.07448	0.73452	0.168306	0.373583	0.360937	77.6212	466.84															294	0.420012	0.146273	0.0013229	0.157094	0.0511626	0.835638	0.109157	0.437393	0.398245	76.9693	450.73
	296	0.540505	0.2222	0.00210368	0.195182	0.07452	0.732434	0.119187	0.373105	0.35933	77.5862	470.083															296	0.418734	0.147067	0.0035691	0.153689	0.0511754	0.829303	0.294974	0.427806	0.401497	77.302	453.061
	298	0.542192	0.221476	0.00224102	0.193522	0.07456	0.732419	0.12691	0.369733	0.362686	77.7883	468.3															298	0.420974	0.146664	0.00166108	0.157024	0.0511878	0.836613	0.137032	0.436982	0.399631	77.0178	451.711
	300	0.543805	0.220699	0.00188405	0.192466	0.0746	0.732833	0.106616	0.367518	0.365315	77.9339	466.407															300	0.42147	0.146297	0.0013594	0.156806	0.0512	0.836906	0.11209	0.436271	0.400634	77.0632	450.472
	302	0.545801	0.221672	0.00134848	0.191835	0.07464	0.734006	0.0762445	0.366117	0.367889	78.0531	468.212															302	0.421167	0.147147	0.00154924	0.157931	0.0512118	0.837626	0.127734	0.439301	0.398325	76.9238	452.986
	304	0.545504	0.222652	0.00204445	0.193366	0.07468	0.734586	0.115579	0.368842	0.365745	77.9073	470.03															304	0.420094	0.14635	2.66358e-07	0.156438	0.0512234	0.833969	2.19281e-05	0.435048	0.398921	77.047	450.43
	306	0.546672	0.223481	0.00184163	0.194445	0.07472	0.736322	0.104045	0.370701	0.365621	77.8482	471.528															306	0.418887	0.147161	0.00229429	0.156522	0.0512346	0.832044	0.189195	0.435188	0.396856	76.9865	452.829
	308	0.544	0.222744	0.00158543	0.193125	0.07476	0.732022	0.0895097	0.367988	0.364034	77.8811	469.721															308	0.418909	0.148135	0.001725	0.157679	0.0512454	0.833316	0.142153	0.438312	0.395004	76.8566	455.728
	310	0.546068	0.221882	0.00229249	0.19464	0.0748	0.735066	0.129411	0.370676	0.36439	77.8119	467.654															310	0.415539	0.148277	0.000705997	0.158291	0.051256	0.828742	0.0581184	0.439923	0.388819	76.6434	456.07
	312	0.545616	0.220139	0.000866963	0.192939	0.07484	0.732775	0.0488745	0.36724	0.365535	77.9488	463.733															312	0.417214	0.147666	0.00254577	0.158587	0.0512662	0.831498	0.209848	0.440658	0.390841	76.6819	454.101
	314	0.548215	0.220895	0.00300015	0.190088	0.07488	0.732717	0.169245	0.36162	0.371096	78.2845	465.076															314	0.413104	0.147933	0.00228733	0.158285	0.0512762	0.824687	0.188467	0.439732	0.384955	76.5387	454.834
	316	0.548747	0.220898	0.00347914	0.189335	0.07492	0.732251	0.196214	0.359995	0.372256	78.3684	464.834															316	0.411633	0.148486	0.00211784	0.159172	0.0512858	0.823371	0.174445	0.442115	0.381256	76.3739	456.45
	318	0.549118	0.222419	0.00241022	0.191326	0.07496	0.733913	0.135776	0.363587	0.370327	78.2021	467.785															318	0.409516	0.148647	0.0024631	0.15957	0.051295	0.820475	0.202905	0.44314	0.377335	76.2355	456.861
	320	0.543358	0.223462	0.00113203	0.191662	0.075	0.727786	0.0636907	0.364031	0.363755	77.9917	469.728															320	0.408413	0.14878	0.00325673	0.159307	0.051304	0.818325	0.268412	0.442331	0.375994	76.2166	457.189
	322	0.547782	0.222746	0.00399812	0.19287	0.07504	0.733026	0.225188	0.36613	0.366896	78.023	467.972															322	0.406552	0.150397	0.00490668	0.156967	0.0513126	0.812488	0.404882	0.435761	0.376727	76.4015	462.081
	324	0.545114	0.222879	0.00261928	0.196491	0.07508	0.732874	0.147333	0.372806	0.360068	77.6176	468.003															324	0.404519	0.149046	0.00434058	0.159354	0.051321	0.812168	0.357943	0.442317	0.369852	76.0371	457.856
	326	0.547183	0.222889	0.00152188	0.198253	0.07512	0.736112	0.0855068	0.37595	0.360163	77.5282	467.775															326	0.404773	0.149012	0.00492919	0.160361	0.051329	0.813658	0.406618	0.445042	0.368616	75.9336	457.681
	328	0.547493	0.22238	0.0042808	0.199944	0.07516	0.737453	0.240762	0.378953	0.3585	77.3898	466.457															328	0.401365	0.150318	0.00493483	0.15936	0.0513366	0.807114	0.407024	0.442197	0.364917	75.8935	461.624
	330	0.547255	0.222054	0.00286328	0.198557	0.0752	0.735657	0.160823	0.376124	0.359534	77.5039	465.526															330	0.401576	0.150163	0.00428398	0.159173	0.051344	0.807091	0.3531	0.441614	0.365477	75.9246	461.08
	332	0.548283	0.222164	0.00455037	0.199023	0.07524	0.736725	0.25569	0.376807	0.359918	77.4957	465.509															332	0.399394	0.149616	0.00513003	0.160331	0.051351	0.805066	0.423073	0.444768	0.360298	75.6917	459.337
	334	0.547502	0.223134	0.00228276	0.199349	0.07528	0.735792	0.128038	0.377223	0.358569	77.4422	467.293															334	0.402033	0.149956	0.00397615	0.160212	0.0513578	0.808841	0.327556	0.444379	0.364462	75.8263	460.322
	336	0.542899	0.219217	0.0026314	0.2009	0.07532	0.731905	0.147544	0.379957	0.351948	77.1581	458.847															336	0.397835	0.15041	0.00448304	0.159812	0.0513642	0.801848	0.369423	0.443214	0.358634	75.6794	461.657
																											338	0.395925	0.150839	0.00372725	0.160114	0.0513702	0.799208	0.306913	0.443999	0.355209	75.5559	462.919
																											340	0.397332	0.151268	0.00346093	0.157745	0.051376	0.798374	0.284889	0.437381	0.360994	75.8951	464.184
																											342	0.39662	0.151378	0.00261823	0.15991	0.0513814	0.799845	0.215348	0.443336	0.35651	75.6118	464.474
																											344	0.394487	0.150518	-0.00128799	0.160813	0.0513866	0.797615	0	0.445796	0.351819	75.4079	461.787
																											346	0.397765	0.150309	-0.000224613	0.159654	0.0513914	0.801125	0	0.442542	0.358583	75.6944	461.102
																											348	0.395311	0.149925	0.000907386	0.160031	0.0513958	0.797773	0.074506	0.443549	0.354224	75.5367	459.887
[truncated: 470 more columns]
